# Supplementary material for: Climatic control of the surface mass balance of the Patagonian Icefields
Source: Copernicus journal article supplement (doi:10.5194/tc-17-1127-2023), 2023-03-07
Supplement: Supplementary file 1 [file tc-17-1127-2023-supplement.pdf]

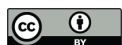

*Supplement of*

## **Climatic control of the surface mass balance of the Patagonian Icefields**

**Tomás Carrasco-Escaff et al.**

*Correspondence to:* Tomás Carrasco-Escaff ([tcarrasco@dgf.uchile.cl](mailto:tcarrasco@dgf.uchile.cl))

The copyright of individual parts of the supplement might differ from the article licence.

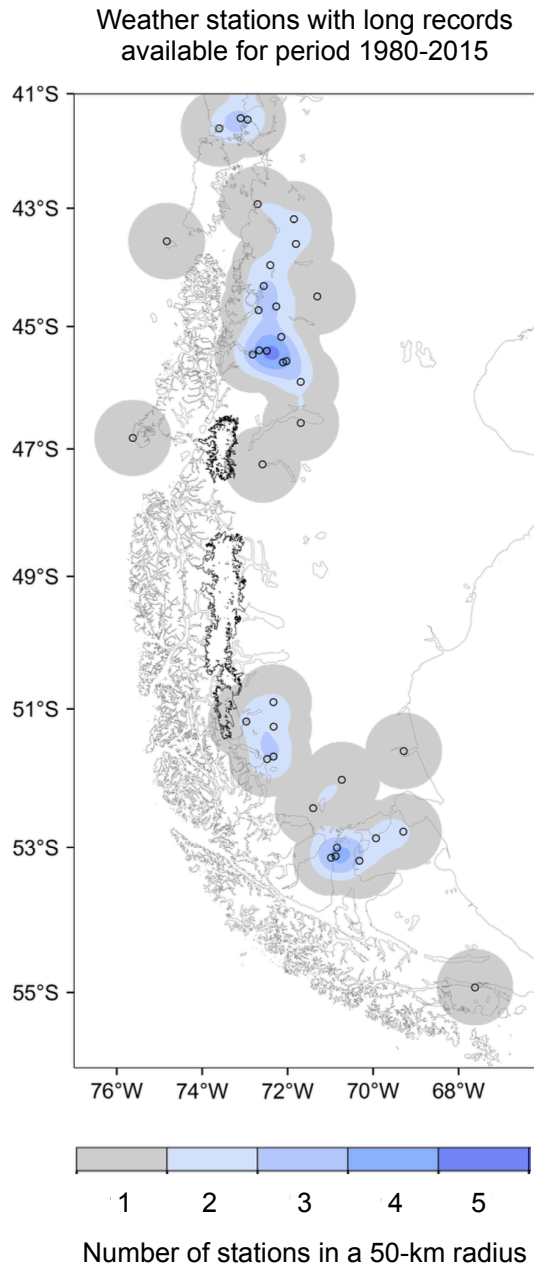

**Figure S1.** Heat map of weather stations with long records of precipitation measurements. Weather stations that register more than 75% of monthly precipitation data between 1980 and 2015 in Patagonia were used to construct the map. Colors indicate the number of stations with long records in a 50 km radius. Data were obtained from the Chilean Weather Service and the Chilean Water Agency.

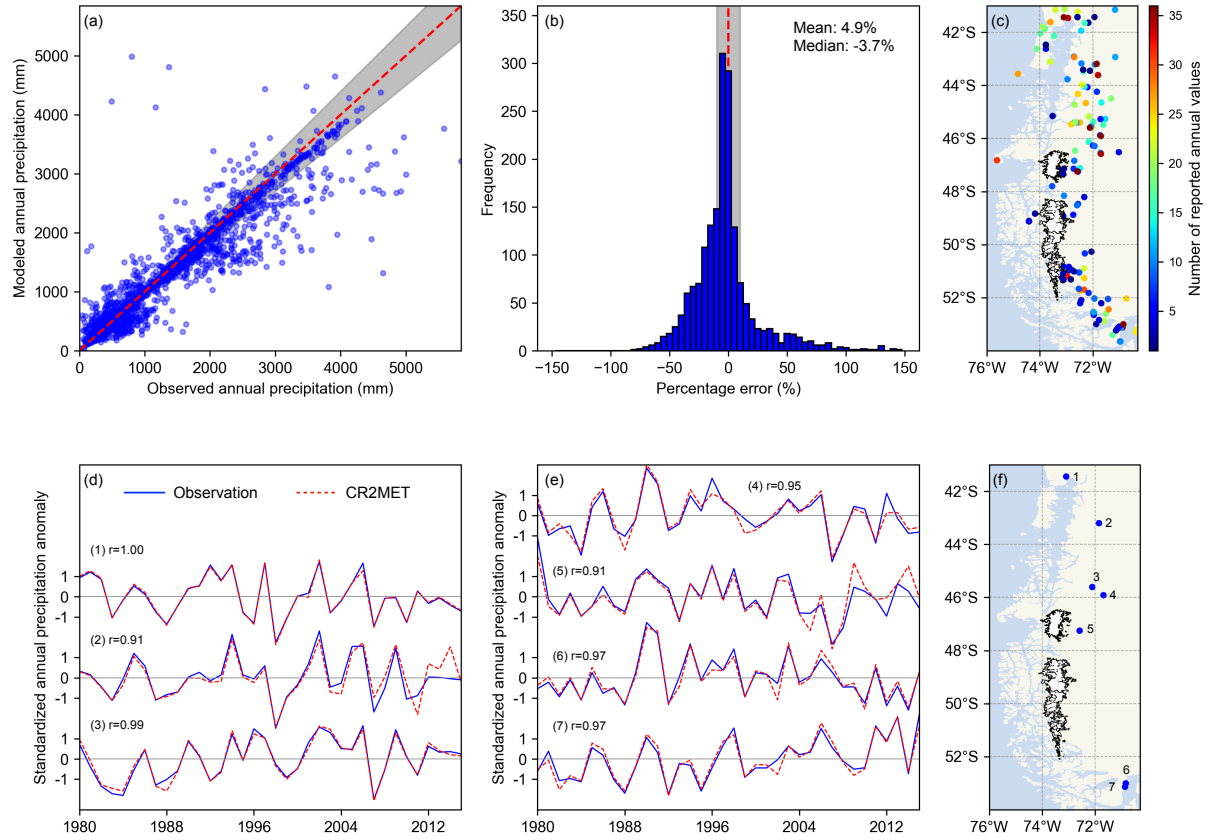

**Figure S2.** Evaluation of the CR2MET performance on annual precipitation estimation using the available surface weather stations. (a) Scatter plot of annual precipitation from the observations and corresponding CR2MET grid points (nearest grid point). Each point represents available data of accumulated precipitation for years between 1980-2015 and weather stations located in Patagonia between 41-52° S. The segmented red line indicates no error in the estimation, while the grey area indicates an error ranging from -5% to 5% of the observed value. (b) Histogram of percentage errors of the CR2MET estimates. Each percentage error is calculated by subtracting the observed value from the CR2MET estimate and dividing it by the observed value. The grey area indicates an error ranging from -5% to 5% of the observed value. (c) Weather stations used in (a) and (b), along with their record lengths. (d) Time series of standardized anomalies of annual precipitation. Each blue line represents the observed annual time series obtained from a weather station located in Patagonia between 41-52° S with annual data for the full period 1980-2015. Segmented red lines correspond to the CR2MET estimates. Above each pair of lines is shown the station id and the correlation between the observed and CR2MET time series. (e) Continuation of (d). (f) Weather stations used in (d) and (e).

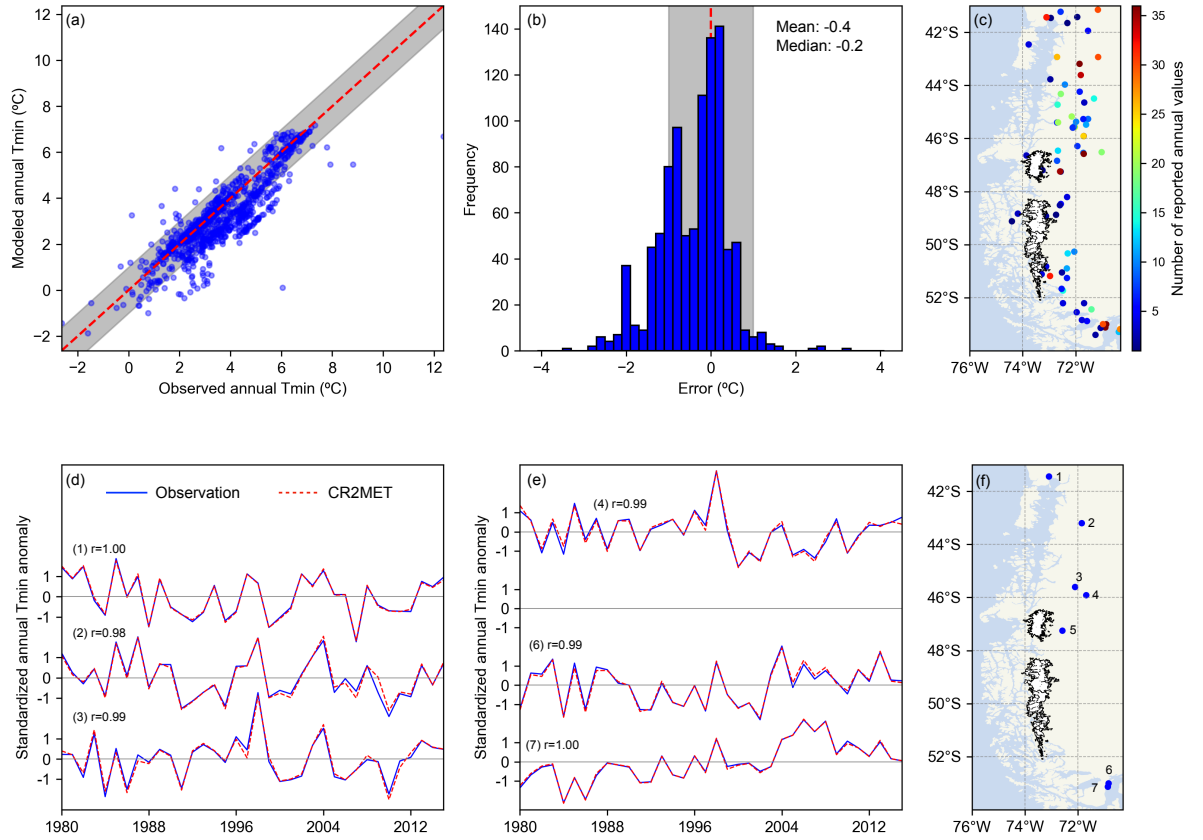

**Figure S3.** Evaluation of the CR2MET performance on the estimation of the annual mean of daily minimum temperature. (a) Scatter plot of annual mean of daily minimum temperature from the observations and corresponding CR2MET grid points (nearest grid point). Each point represents available data of annual mean of daily minimum temperature for years between 1980-2015 and weather stations located in Patagonia between 41°-52° S. The segmented red line indicates no error in the estimation, while the grey area indicates an error ranging from -5% to 5% of the observed value. (b) Histogram of errors of the CR2MET estimates. Each error is calculated by subtracting the observed value from the CR2MET estimate. The grey area indicates an error ranging from -5% to 5% of the observed value. (c) Weather stations used in (a) and (b), along with their record lengths. (d) Time series of standardized anomalies of the annual mean of daily minimum temperature. Each blue line represents the observed annual time series obtained from a weather station located in Patagonia between 41°-52° S with annual data for the full period 1980-2015. Segmented red lines correspond to the CR2MET estimates. Above each pair of lines is shown the station id and the correlation between the observed and CR2MET times series. (e) Continuation of (d). (f) Weather stations used in (d) and (e).



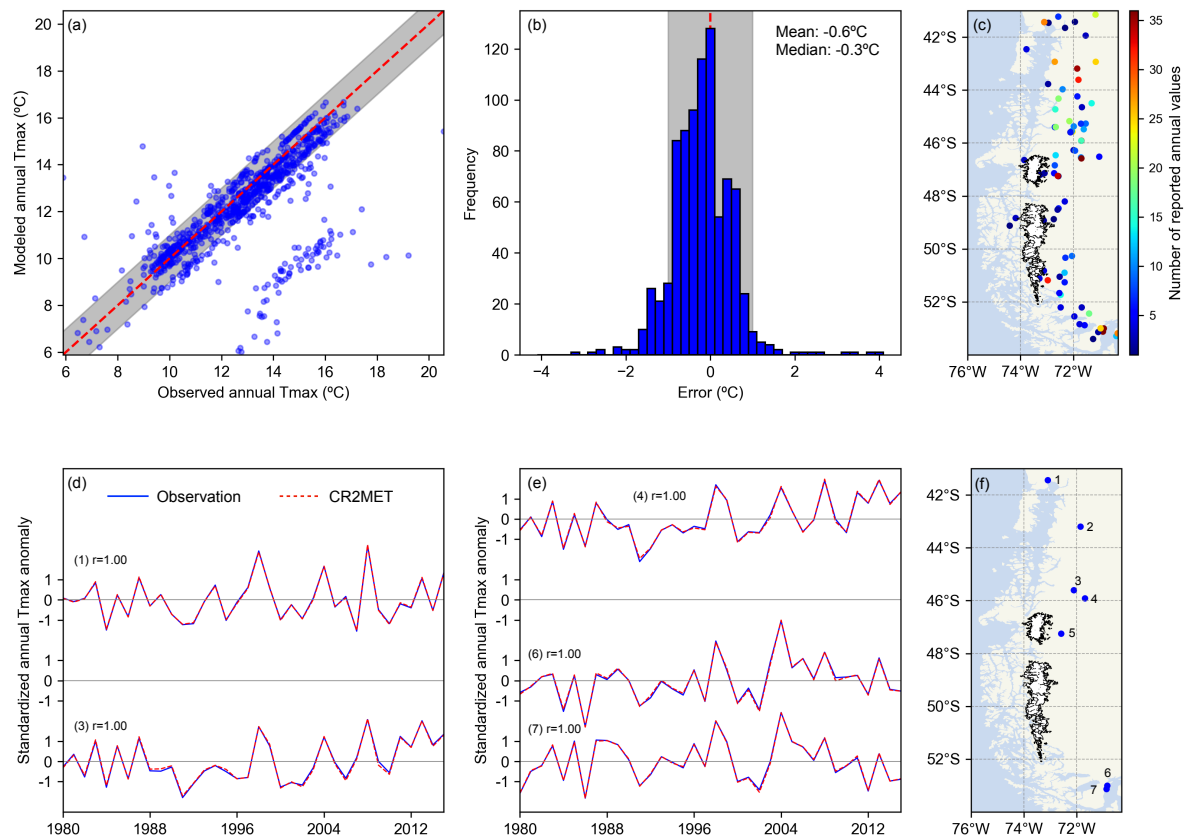

**Figure S4.** The same as in Fig. S3 but for the annual mean of daily maximum temperature.

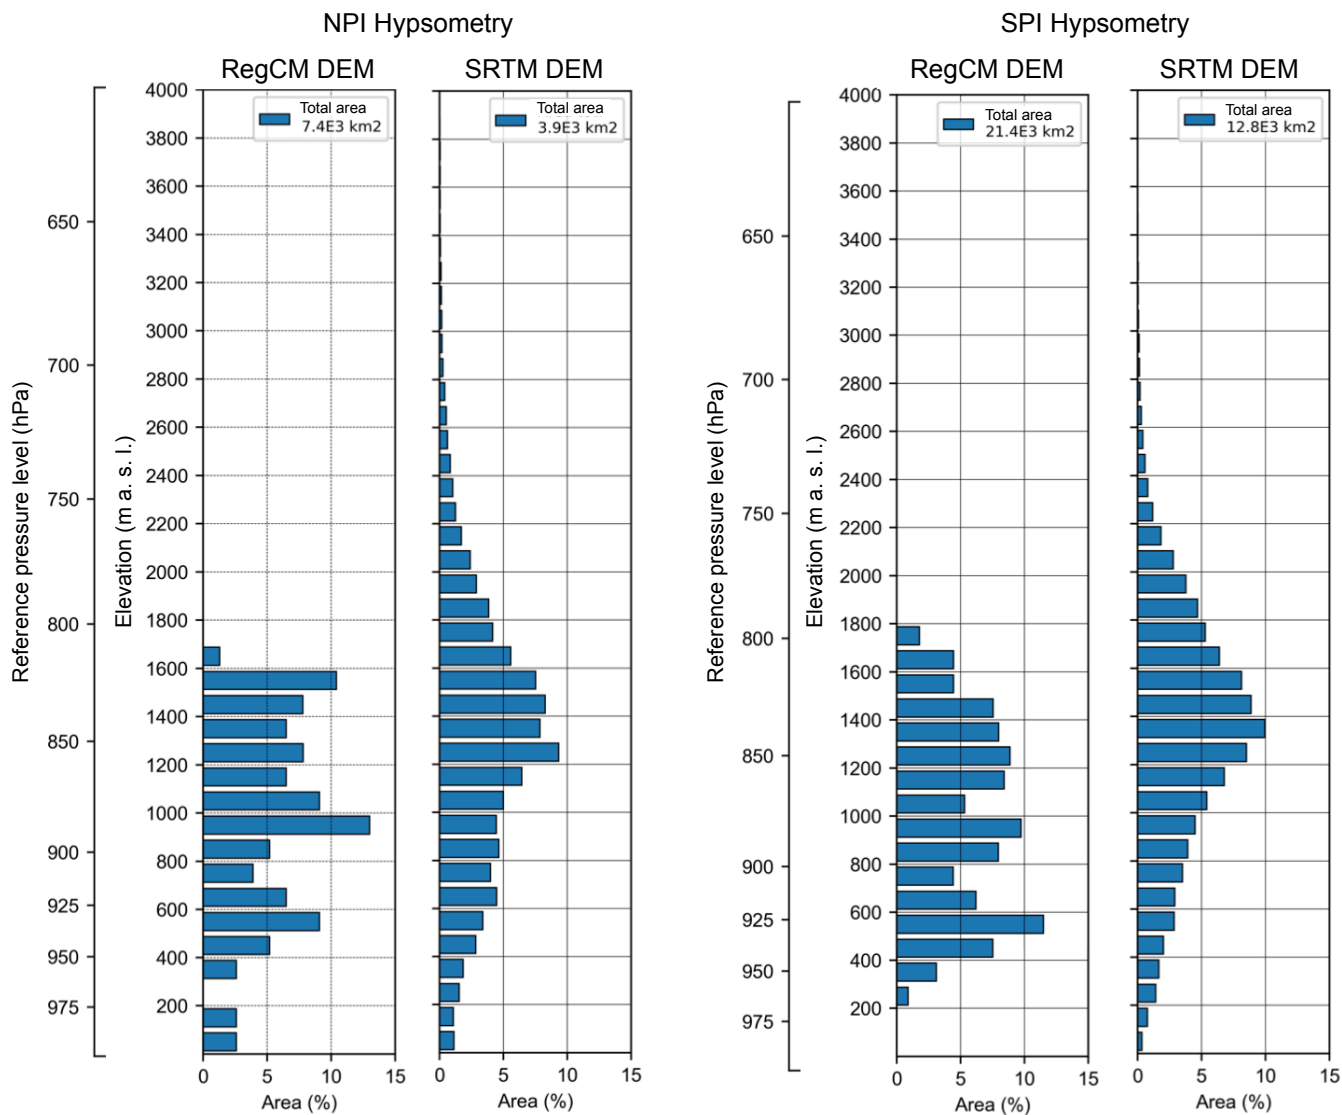

**Figure S5.** The two leftmost panels show the comparison between the NPI hypsometry obtained from the RegCMv4 DEM ( $\sim 10$  km spatial resolution) versus the one obtained from the SRTMv3 DEM ( $\sim 90$  m spatial resolution). The two rightmost panels show the same but for the SPI.

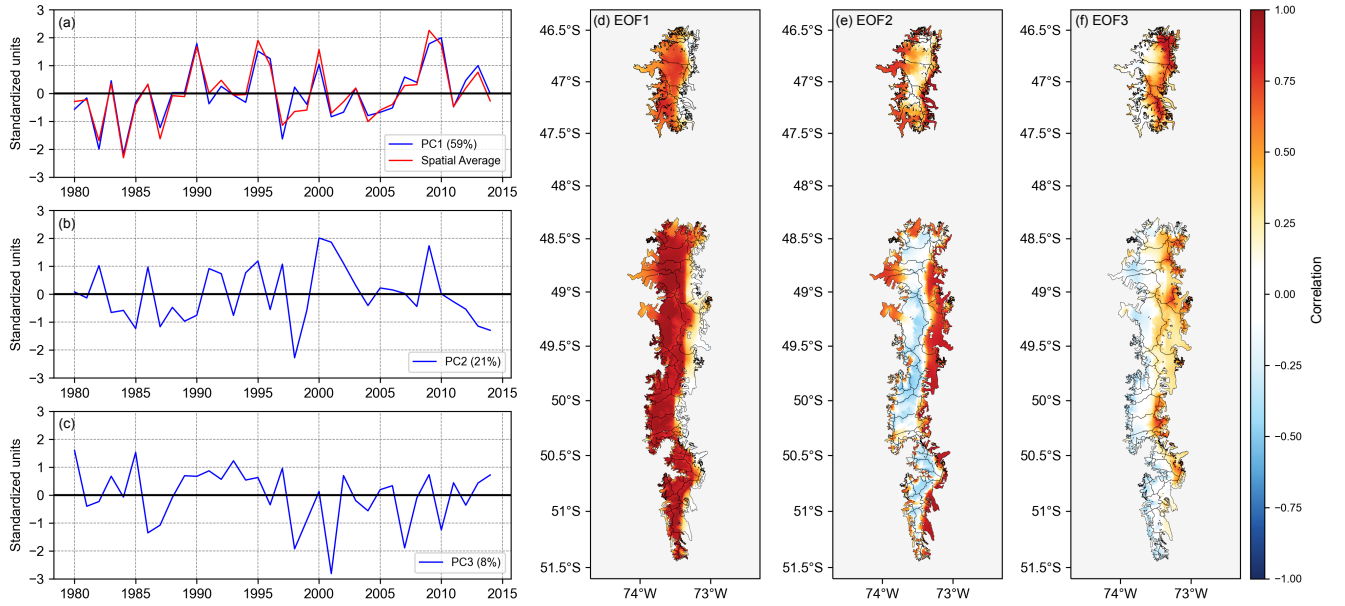

**Figure S6.** First three leading modes of variability of the annual SMB field of the Patagonian Icefields derived from the Empirical Orthogonal Function (EOF) analysis. (a) The blue line represents the first Principal Component (PC) scaled to unit variance (i.e., divided by the square-root of their eigenvalue), and the red line corresponds to the standardized anomalies of the spatial average of the annual SMB field over the Patagonian Icefields. (b) and (c): second and third PCs scaled to unit variance, respectively. (d) First EOF expressed as the correlation between the first PC and the time series of the annual SMB anomaly at each grid point. (e) and (f): the same as in (d) but for the second and third leading modes of variability, respectively.

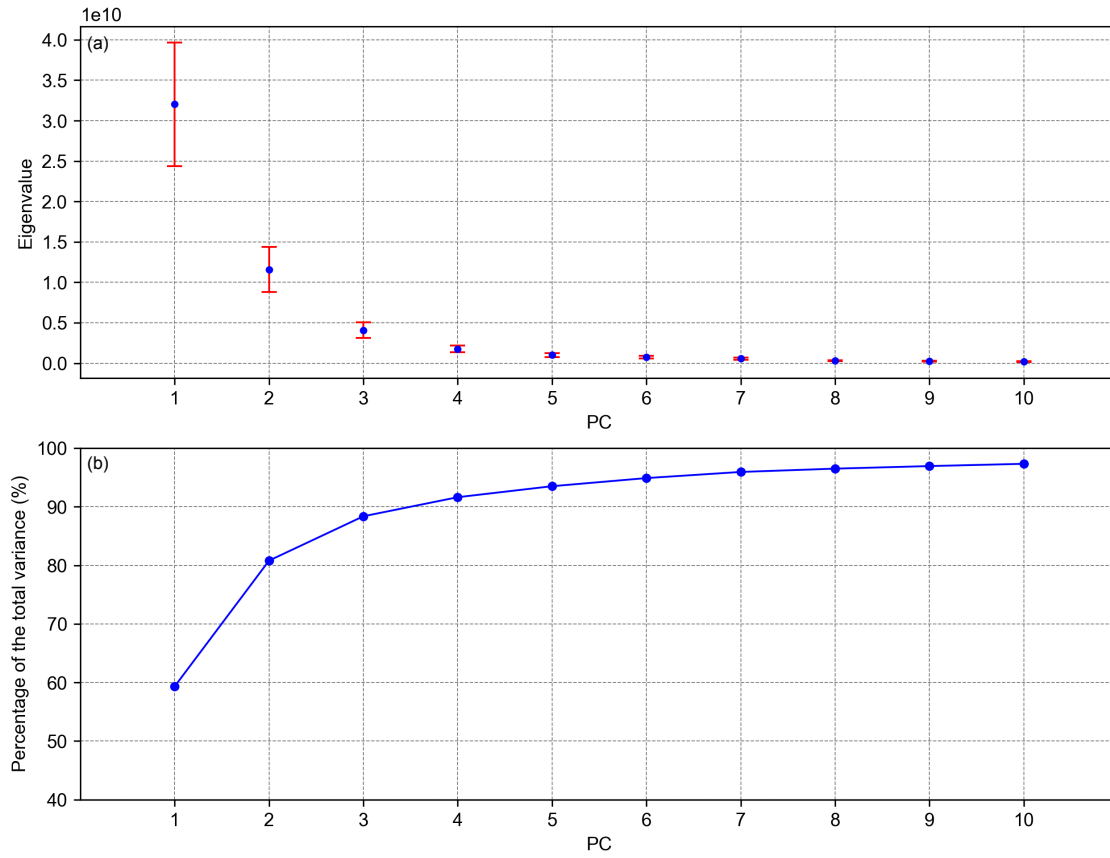

**Figure S7.** (a) Eigenvalues of the first ten leading modes of variability of the annual SMB field of the Patagonian Icefields derived from the EOF analysis (blue points) along with its typical errors (red error bars) computed using the method of North et al. (1982). (b) Accumulated percentage of the total variance explained by each PC.

### Annual NPI SMB projected onto annual fields of selected variables

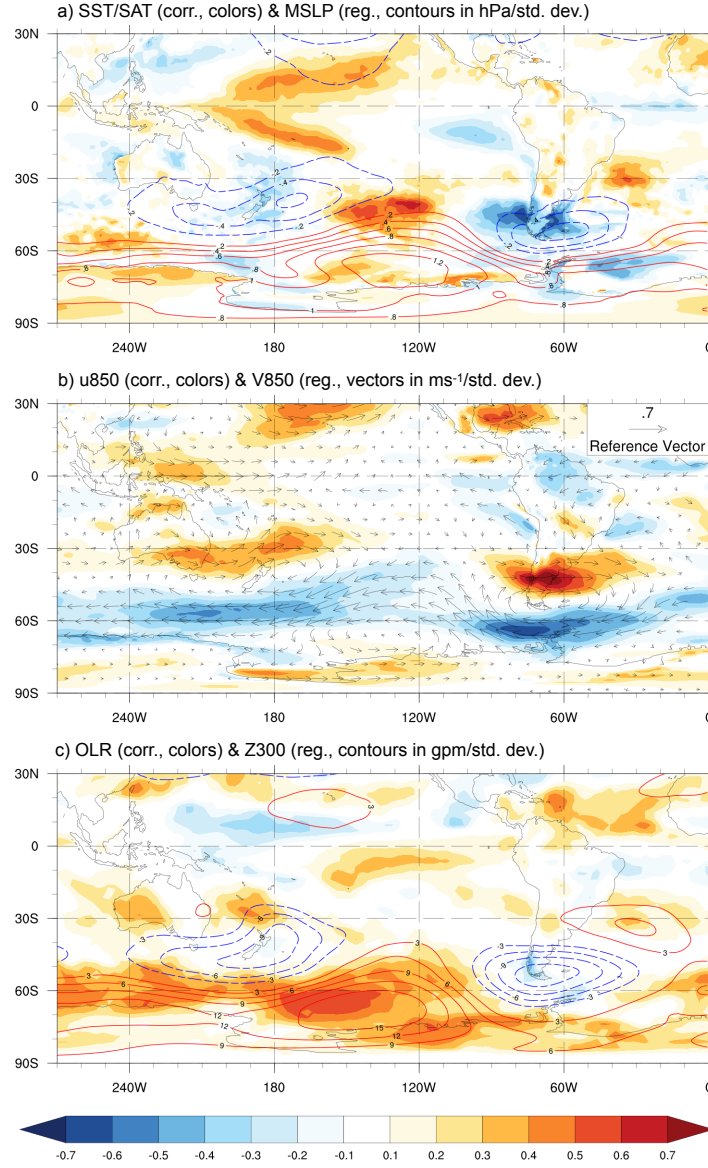

**Figure S8.** The same as in Fig. 8 in the main text but for the NPI-only annual SMB time series.

### Annual SPI SMB projected onto annual fields of selected variables

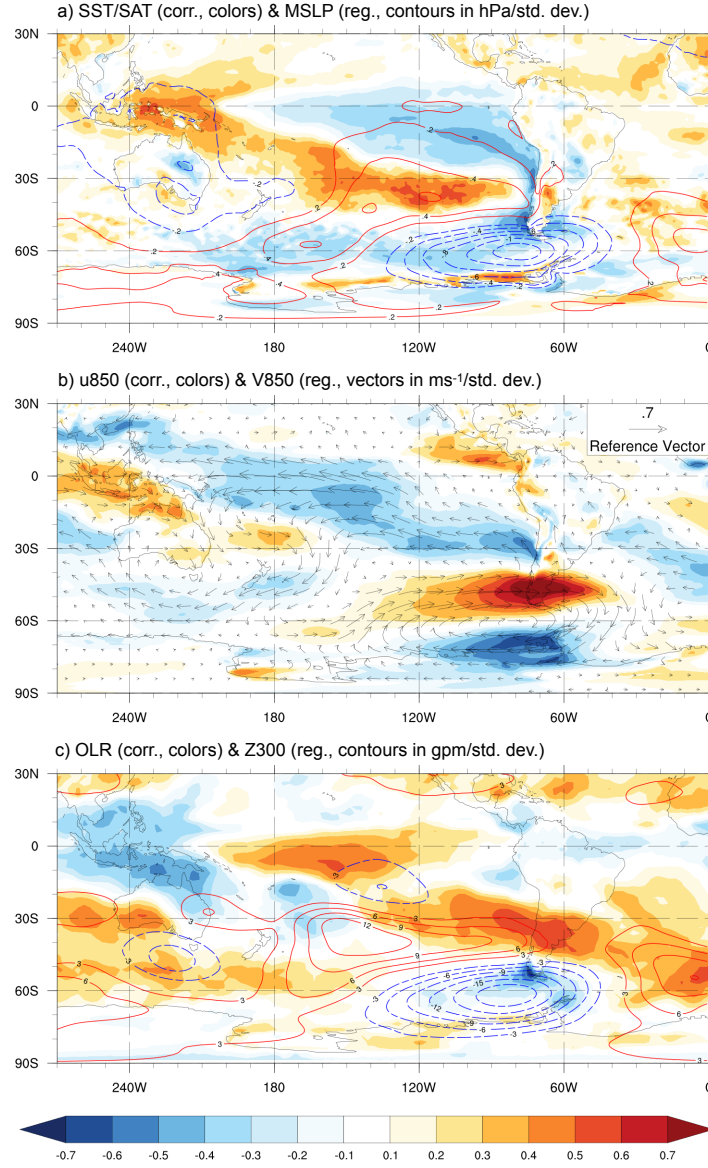

**Figure S9.** The same as in Fig. 8 in the main text but for the SPI-only annual SMB time series.

**Inverse of annual EP ENSO index  
projected onto annual fields of selected variables**

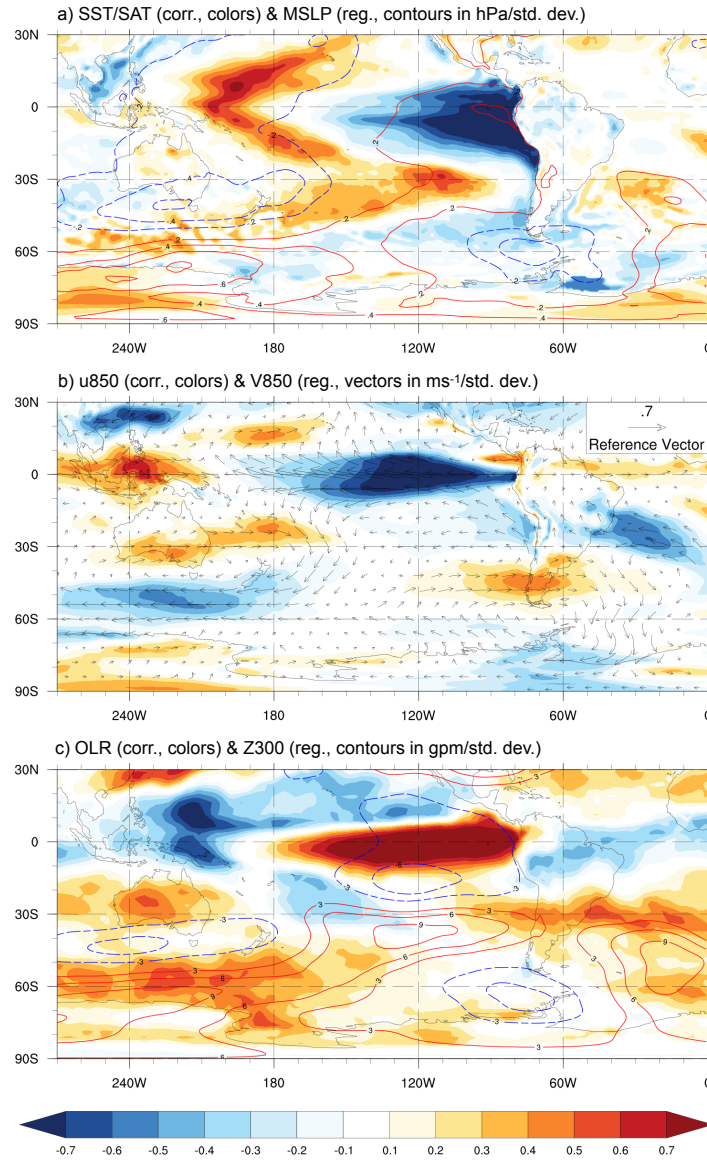

**Figure S10.** The same as in Fig. 8 in the main text but for the inverse of the annual EP ENSO index.

**Inverse of annual CP ENSO index  
projected onto annual fields of selected variables**

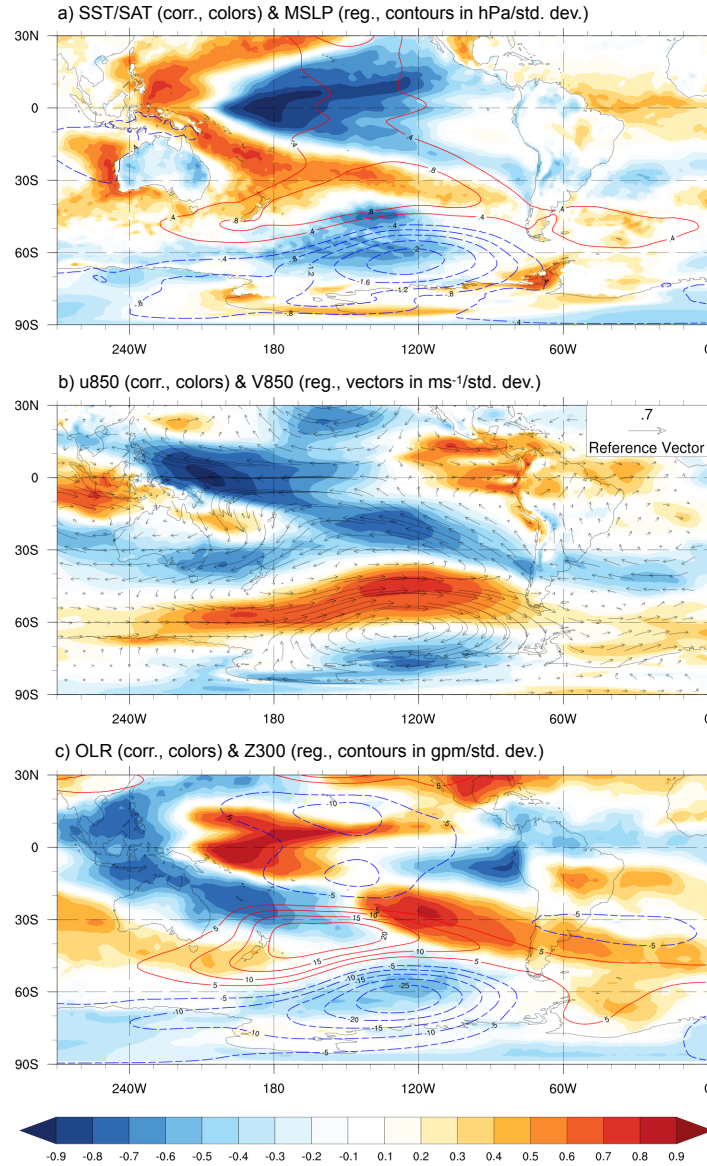

**Figure S11.** The same as in Fig. 8 in the main text but for the inverse of the annual CP ENSO index.



### Annual AAO index projected onto annual fields of selected variables

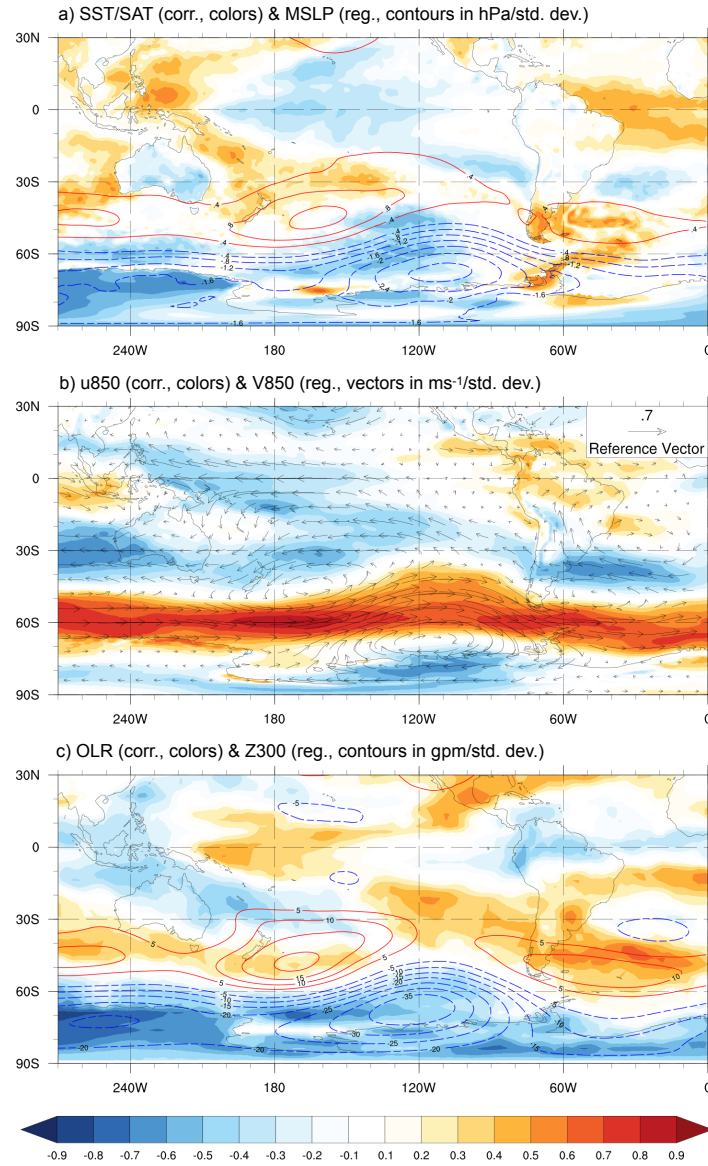

**Figure S12.** The same as in Fig. 8 in the main text but for the annual AAO index.

**Table S1.** Mean values of the annual (April to March), winter (April to September) and summer (October to March) time series of the spatially averaged modeled fields from 1980 to 2015.

| Mean values | SMB     | Accumulation | Ablation | Precipitation | Temperature | Insolation       |
|-------------|---------|--------------|----------|---------------|-------------|------------------|
| Units       | mm w.e. | mm w.e.      | mm w.e.  | mm w.e.       | °C          | Wm <sup>-2</sup> |
| Annual      | 469     | 4748         | 4279     | 6430          | -1.82       | 123              |
| Winter      | 1806    | 2633         | 827      | 3214          | -3.44       | 56               |
| Summer      | -1336   | 2115         | 3452     | 3217          | -0.20       | 191              |

**Table S2.** Standard deviations of the annual (April to March), winter (April to September) and summer (October to March) time series of the spatially averaged modeled fields from 1980 to 2015.

| Standard deviation | SMB     | Accumulation | Ablation | Precipitation | Temperature | Insolation       |
|--------------------|---------|--------------|----------|---------------|-------------|------------------|
| Units              | mm w.e. | mm w.e.      | mm w.e.  | mm w.e.       | °C          | Wm <sup>-2</sup> |
| Annual             | 537     | 403          | 272      | 536           | 0.37        | 4                |
| Winter             | 331     | 333          | 112      | 425           | 0.57        | 3                |
| Summer             | 428     | 237          | 238      | 327           | 0.42        | 7                |

**Table S3.** Correlation between pairs of annual (April to March) time series of the spatially averaged modeled fields from 1980 to 2015. (\*) Statistically significant value at a significance level of 5%.

| Annual corr.  | SMB    | Accumulation | Ablation | Precipitation | Temperature | Insolation |
|---------------|--------|--------------|----------|---------------|-------------|------------|
| SMB           | 1.00   | -            | -        | -             | -           | -          |
| Accumulation  | 0.87*  | 1.00         | -        | -             | -           | -          |
| Ablation      | -0.68* | -0.23        | 1.00     | -             | -           | -          |
| Precipitation | 0.69*  | 0.90*        | -0.02    | 1.00          | -           | -          |
| Temperature   | -0.25  | 0.19         | 0.78*    | 0.45*         | 1.00        | -          |
| Insolation    | -0.44* | -0.33        | 0.37*    | -0.53*        | -0.19       | 1.00       |

**Table S4.** Correlation between pairs of winter (April to September) time series of the spatially averaged modeled fields from 1980 to 2015.  
 (\*) Statistically significant value at a significance level of 5%.

| Winter corr.  | SMB    | Accumulation | Ablation | Precipitation | Temperature | Insolation |
|---------------|--------|--------------|----------|---------------|-------------|------------|
| SMB           | 1.00   | -            | -        | -             | -           | -          |
| Accumulation  | 0.94*  | 1.00         | -        | -             | -           | -          |
| Ablation      | -0.15  | 0.18         | 1.00     | -             | -           | -          |
| Precipitation | 0.86*  | 0.97*        | 0.32     | 1.00          | -           | -          |
| Temperature   | 0.18   | 0.46*        | 0.84*    | 0.61*         | 1.00        | -          |
| Insolation    | -0.57* | -0.59*       | -0.05    | -0.66*        | -0.48*      | 1.00       |

**Table S5.** Correlation between pairs of summer (October to March) time series of the spatially averaged modeled fields from 1980 to 2015.  
 (\*) Statistically significant value at a significance level of 5%.

| Summer corr.  | SMB    | Accumulation | Ablation | Precipitation | Temperature | Insolation |
|---------------|--------|--------------|----------|---------------|-------------|------------|
| SMB           | 1.00   | -            | -        | -             | -           | -          |
| Accumulation  | 0.90*  | 1.00         | -        | -             | -           | -          |
| Ablation      | -0.90* | -0.62*       | 1.00     | -             | -           | -          |
| Precipitation | 0.64*  | 0.83*        | -0.31    | 1.00          | -           | -          |
| Temperature   | -0.70* | -0.40*       | 0.86*    | 0.05*         | 1.00        | -          |
| Insolation    | -0.61* | -0.58*       | 0.51*    | -0.76*        | 0.08        | 1.00       |

**Table S6.** Sensitivity of the modeled SMB to the main model parameters and to the complexity of the solar radiation remapping.  $\bar{x}$  and  $s$  are the mean value and standard deviation (measured in mm w.e.) of the annual SMB time series obtained from each experiment, respectively.  $\bar{x}_0$  and  $s_0$  correspond to the same statistics but for the control time series.  $r$  represents the correlation between the annual SMB time series obtained from each experiment and the control time series.

| Parameter                                       | Value | $\bar{x}$ | $s$ | $\bar{x} - \bar{x}_0$ | $s/s_0$ | $r$  |
|-------------------------------------------------|-------|-----------|-----|-----------------------|---------|------|
| $\Delta c_0$ ( $\text{Wm}^{-2}$ )               | -4.0  | 758       | 532 | 289                   | 0.99    | 1.00 |
|                                                 | -3.0  | 687       | 533 | 218                   | 0.99    | 1.00 |
|                                                 | -2.0  | 615       | 534 | 146                   | 1.00    | 1.00 |
|                                                 | -1.0  | 543       | 535 | 73                    | 1.00    | 1.00 |
|                                                 | 1.0   | 395       | 538 | -74                   | 1.00    | 1.00 |
|                                                 | 2.0   | 320       | 539 | -149                  | 1.00    | 1.00 |
|                                                 | 3.0   | 244       | 540 | -225                  | 1.01    | 1.00 |
|                                                 | 4.0   | 168       | 541 | -302                  | 1.01    | 1.00 |
| $\Delta c_1$ ( $\text{Wm}^{-2}\text{°C}^{-1}$ ) | -2.0  | 535       | 523 | 65                    | 0.98    | 1.00 |
|                                                 | -1.5  | 523       | 527 | 53                    | 0.98    | 1.00 |
|                                                 | -1.0  | 508       | 530 | 38                    | 0.99    | 1.00 |
|                                                 | -0.5  | 490       | 533 | 20                    | 0.99    | 1.00 |
|                                                 | 0.5   | 447       | 540 | -23                   | 1.01    | 1.00 |
|                                                 | 1.0   | 422       | 544 | -47                   | 1.01    | 1.00 |
|                                                 | 1.5   | 395       | 547 | -74                   | 1.02    | 1.00 |
|                                                 | 2.0   | 367       | 551 | -102                  | 1.03    | 1.00 |
| Albedo                                          | A1    | -714      | 561 | -1183                 | 1.05    | 1.00 |
|                                                 | A2    | -3436     | 620 | -3905                 | 1.16    | 0.98 |
| $\Delta T_{\text{th}}$ ( $\text{°C}$ )          | -1.00 | 127       | 534 | -342                  | 0.99    | 1.00 |
|                                                 | -0.75 | 217       | 534 | -253                  | 1.00    | 1.00 |
|                                                 | -0.50 | 304       | 535 | -166                  | 1.00    | 1.00 |
|                                                 | -0.25 | 388       | 536 | -81                   | 1.00    | 1.00 |
|                                                 | 0.25  | 548       | 537 | 79                    | 1.00    | 1.00 |
|                                                 | 0.50  | 624       | 538 | 154                   | 1.00    | 1.00 |
|                                                 | 0.75  | 697       | 539 | 227                   | 1.00    | 1.00 |
|                                                 | 1.00  | 767       | 540 | 297                   | 1.01    | 1.00 |
| Sloped surface                                  | /     | 850       | 415 | 1374                  | 0.80    | 0.99 |

**Table S7.** The same as in Table S6 but for the sensitivity of the modeled SMB to the mean value of the near-surface air temperature and precipitation forcing.

| $\Delta T$ | $P_0$ | $\bar{x}$ | $s$ | $\bar{x} - \bar{x}_0$ | $s/s_0$ | $r$  |
|------------|-------|-----------|-----|-----------------------|---------|------|
| -1.5       | 0.8   | 1078      | 465 | 608                   | 0.87    | 0.99 |
| -1.5       | 0.9   | 1688      | 501 | 1218                  | 0.93    | 0.98 |
| -1.5       | 1.0   | 2289      | 539 | 1820                  | 1.00    | 0.98 |
| -1.5       | 1.1   | 2884      | 577 | 2415                  | 1.08    | 0.97 |
| -1.5       | 1.2   | 3473      | 616 | 3004                  | 1.15    | 0.97 |
| -1.0       | 0.8   | 559       | 467 | 90                    | 0.87    | 0.99 |
| -1.0       | 0.9   | 1152      | 502 | 682                   | 0.93    | 0.99 |
| -1.0       | 1.0   | 1736      | 537 | 1266                  | 1.00    | 0.99 |
| -1.0       | 1.1   | 2313      | 574 | 1844                  | 1.07    | 0.99 |
| -1.0       | 1.2   | 2884      | 612 | 2415                  | 1.14    | 0.98 |
| -0.5       | 0.8   | -8        | 470 | -477                  | 0.88    | 1.00 |
| -0.5       | 0.9   | 565       | 502 | 96                    | 0.94    | 1.00 |
| -0.5       | 1.0   | 1129      | 536 | 660                   | 1.00    | 1.00 |
| -0.5       | 1.1   | 1685      | 571 | 1216                  | 1.06    | 0.99 |
| -0.5       | 1.2   | 2236      | 607 | 1767                  | 1.13    | 0.99 |
| 0.0        | 0.8   | -624      | 476 | -1093                 | 0.89    | 1.00 |
| 0.0        | 0.9   | -72       | 505 | -541                  | 0.94    | 1.00 |
| 0.0        | 1.1   | 1003      | 570 | 534                   | 1.06    | 1.00 |
| 0.0        | 1.2   | 1530      | 603 | 1061                  | 1.12    | 1.00 |
| 0.5        | 0.8   | -1291     | 485 | -1760                 | 0.90    | 0.99 |
| 0.5        | 0.9   | -760      | 511 | -1229                 | 0.95    | 0.99 |
| 0.5        | 1.0   | -242      | 540 | -711                  | 1.01    | 1.00 |
| 0.5        | 1.1   | 267       | 570 | -202                  | 1.06    | 1.00 |
| 0.5        | 1.2   | 770       | 602 | 300                   | 1.12    | 1.00 |
| 1.0        | 0.8   | -2012     | 502 | -2481                 | 0.93    | 0.98 |
| 1.0        | 0.9   | -1501     | 523 | -1970                 | 0.98    | 0.98 |
| 1.0        | 1.0   | -1005     | 548 | -1474                 | 1.02    | 0.99 |
| 1.0        | 1.1   | -519      | 575 | -989                  | 1.07    | 0.99 |
| 1.0        | 1.2   | -42       | 603 | -512                  | 1.12    | 0.99 |
| 1.5        | 0.8   | -2790     | 524 | -3259                 | 0.98    | 0.96 |
| 1.5        | 0.9   | -2296     | 542 | -2765                 | 1.01    | 0.97 |
| 1.5        | 1.0   | -1820     | 563 | -2289                 | 1.05    | 0.97 |
| 1.5        | 1.1   | -1357     | 586 | -1826                 | 1.09    | 0.98 |
| 1.5        | 1.2   | -904      | 611 | -1374                 | 1.14    | 0.98 |

**Table S8.** The same as in Table S6 but for the sensitivity of the modeled SMB to the mean value of the surface downward solar radiation forcing.

| $R_0$ | $\bar{x}$ | $s$ | $\bar{x} - \bar{x}_0$ | $s/s_0$ | $r$  |
|-------|-----------|-----|-----------------------|---------|------|
| 1.1   | 129       | 550 | -340                  | 1.03    | 1.00 |
| 1.2   | -220      | 565 | -690                  | 1.05    | 1.00 |
| 1.3   | -580      | 580 | -1048                 | 1.08    | 1.00 |
| 1.4   | -948      | 596 | -1418                 | 1.11    | 1.00 |
| 1.5   | -1326     | 613 | -1795                 | 1.14    | 0.99 |

**Table S9.** The same as in Table S6 but for the sensitivity of the modeled SMB to the interannual variability of the meteorological input.  $R^2$  corresponds to the squared correlation.

| Variability $\tau \geq 1$ yr<br>removed from | Time series | $\bar{x}$ | $s$ | $\bar{x} - \bar{x}_0$ | $s/s_0$ | $r$  | $R^2$ |
|----------------------------------------------|-------------|-----------|-----|-----------------------|---------|------|-------|
| Precipitation                                | Annual      | 751       | 402 | 282                   | 0.75    | 0.51 | 26 %  |
|                                              | Winter      | 1981      | 189 | 175                   | 0.57    | 0.04 | 0 %   |
|                                              | Summer      | -1230     | 334 | 107                   | 0.78    | 0.82 | 67 %  |
| Temperature                                  | Annual      | 1225      | 561 | 756                   | 1.05    | 0.67 | 45 %  |
|                                              | Winter      | 2208      | 417 | 402                   | 1.26    | 0.86 | 74%   |
|                                              | Summer      | -983      | 316 | 353                   | 0.74    | 0.63 | 40 %  |
| Insolation                                   | Annual      | 479       | 510 | 9                     | 0.95    | 0.98 | 95 %  |
|                                              | Winter      | 1806      | 319 | 0                     | 0.96    | 1.00 | 99 %  |
|                                              | Summer      | -1327     | 384 | 9                     | 0.9     | 0.97 | 95 %  |
